# Supplementary material for: Idiopathic male infertility and polymorphisms in the DNA methyltransferase genes involved in epigenetic marking
Source: PubMed Central journal article supplement (PMC5593912; doi:10.1038/s41598-017-11636-9), 2017-09-11

## **Title page**

### **Idiopathic male infertility and polymorphisms in the DNA methyltransferase genes involved in epigenetic marking**

Qiuqin Tang<sup>1, †</sup>, Yiqiu Chen<sup>2, 3, †</sup>, Wei Wu<sup>2, 3, 4, \*</sup>, Hongjuan Ding<sup>1</sup>, Yankai Xia<sup>2, 3, \*</sup>,  
Daozhen Chen<sup>4</sup>, Xinru Wang<sup>2, 3</sup>

<sup>1</sup> State Key Laboratory of Reproductive Medicine, Department of Obstetrics, Nanjing Maternity and Child Health Hospital, Obstetrics and Gynecology Hospital Affiliated to Nanjing Medical University, Nanjing 210004, China

<sup>2</sup> State Key Laboratory of Reproductive Medicine, Institute of Applied Toxicology, School of Public Health, Nanjing Medical University, Nanjing 211166, China

<sup>3</sup> Key Laboratory of Modern Toxicology of Ministry of Education, Nanjing Medical University, Nanjing 211166, China

<sup>4</sup> Clinical Laboratory, Wuxi Maternity and Child Health Care Hospital Affiliated to Nanjing Medical University, Wuxi 214002, China

† These authors contributed equally to the study and they should be regarded as joint first authors.

\*To whom correspondence should be addressed:

Wei Wu Ph.D. or Yankai Xia Ph.D.

State Key Laboratory of Reproductive Medicine, Institute of Toxicology,

Nanjing Medical University, 101 Longmian Avenue, Nanjing 211166, China.

Tel: +86-25-86868425 Fax: +86-25-86868499

Email: [wwu@njmu.edu.cn](mailto:wwu@njmu.edu.cn); [yankaixia@njmu.edu.cn](mailto:yankaixia@njmu.edu.cn)

## Figure legends

**Figure S1. A predicted effect of the variant rs2424909 on transcription factor-binding site.** Comparison between C allele (A) and T allele (B) of rs2424909 for the putative transcriptional factor-binding site.

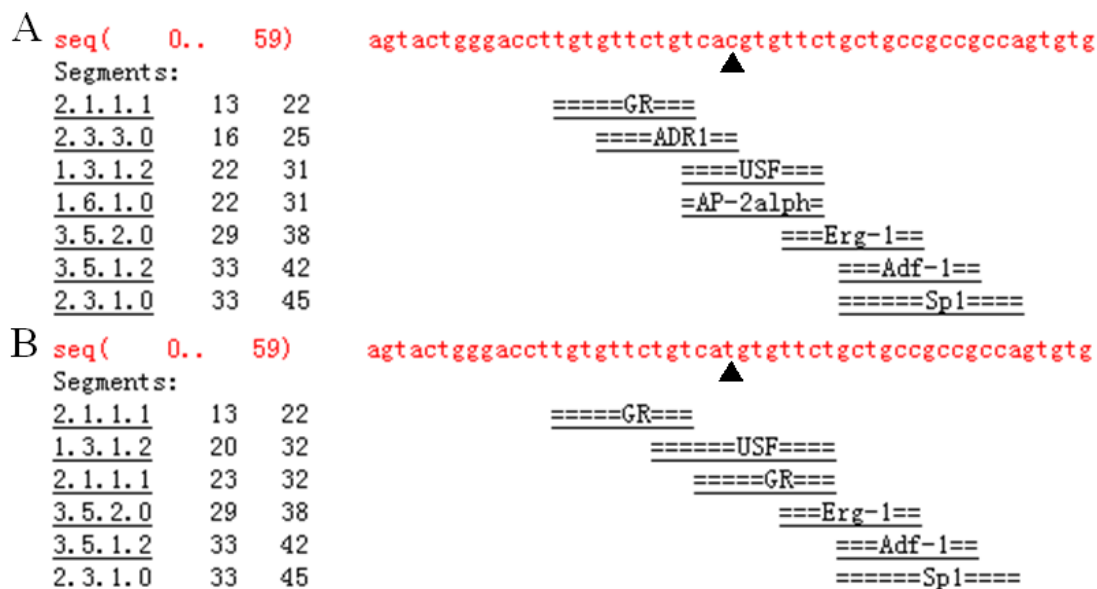

**Figure S2. A predicted effect of the variant rs4804490 on transcription factor-binding site.** Comparison between C allele (A) and A allele (B) of rs4804490 for the putative transcriptional factor-binding site.

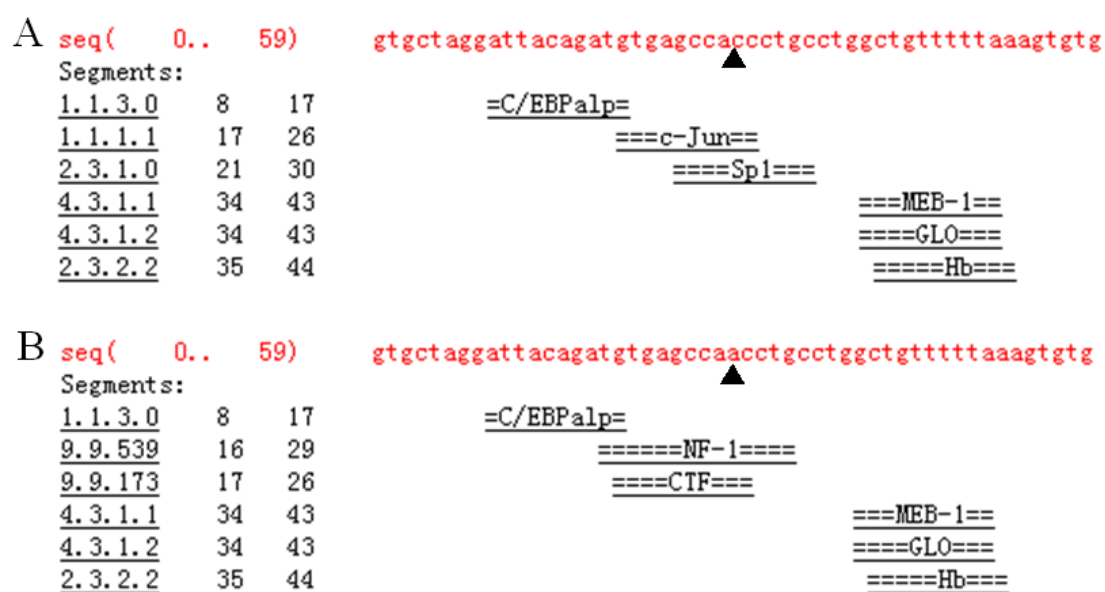

**Figure S3. A predicted effect of the variant rs1550117 on transcription factor-binding site.** Comparison between A allele (A) and G allele (B) of rs1550117 for the putative transcriptional factor-binding site.

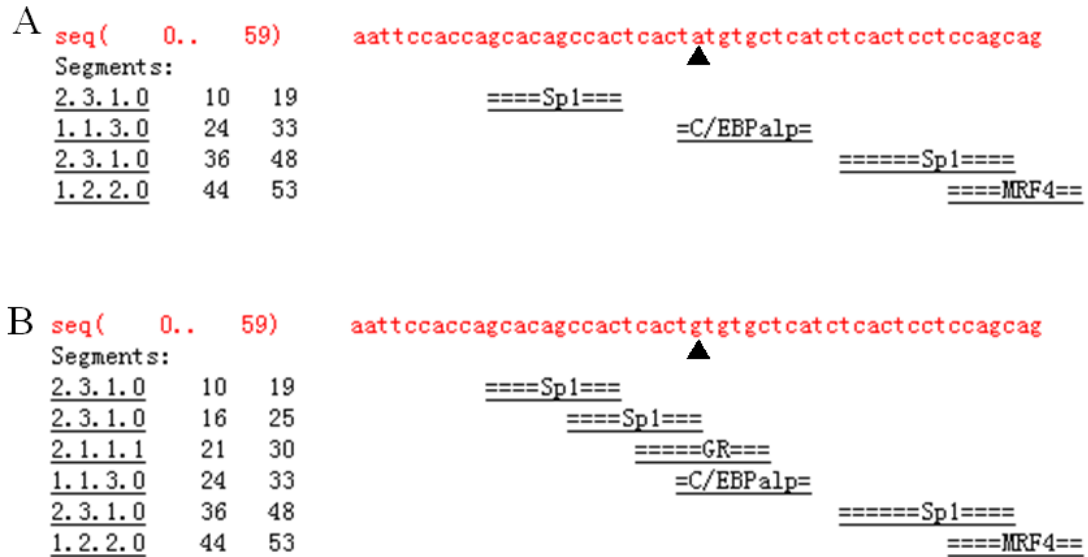

**Figure S4. A predicted effect of the variant rs7354779 on transcription factor-binding site.** Comparison between C allele (A) and T allele (B) of rs7354779 for the putative transcriptional factor-binding site.

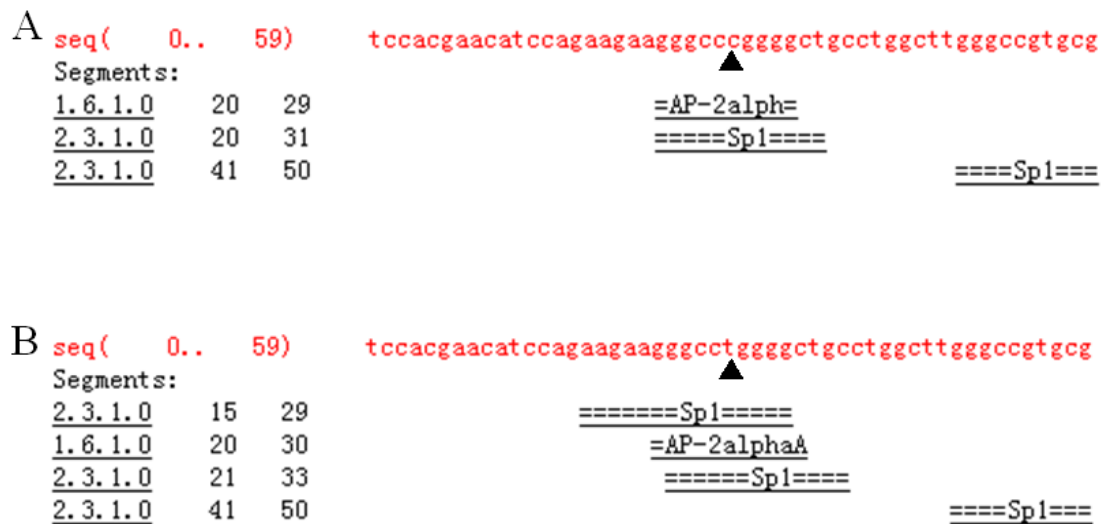

Supplement: 41598_2017_11636_MOESM1_ESM.pdf [file 41598_2017_11636_MOESM1_ESM.pdf]
